# Supplementary material
Source: Research Square preprint supplement (doi:10.21203/rs.3.rs-8896508/v1)

**A** Top 10 proteins in selected GO terms related to 'Ribosome'

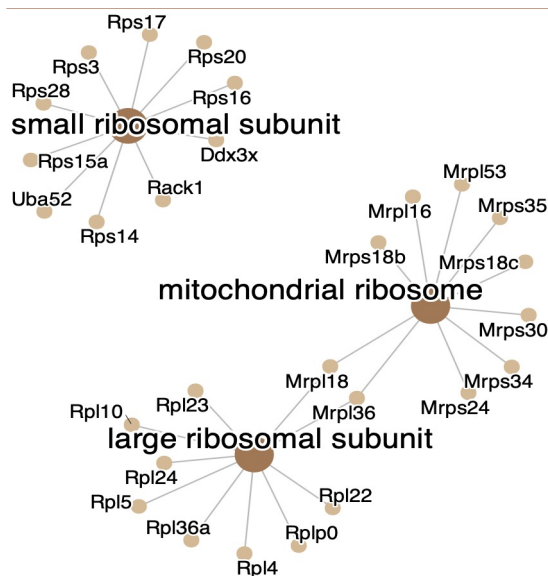

**B** Transcriptome, APP<sup>NL-G-F</sup> (9 mo vs 3 mo), GSEA (GO: BP)

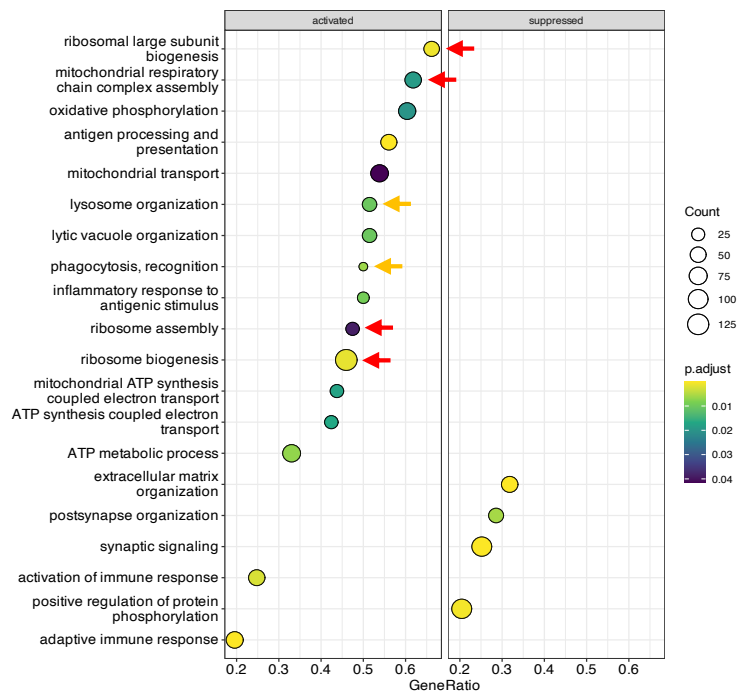

## Extended Figure 2

### A Proteome, APPNL-G-F; Trem2<sup>KO</sup> vs APPNL-G-F, 3 mo

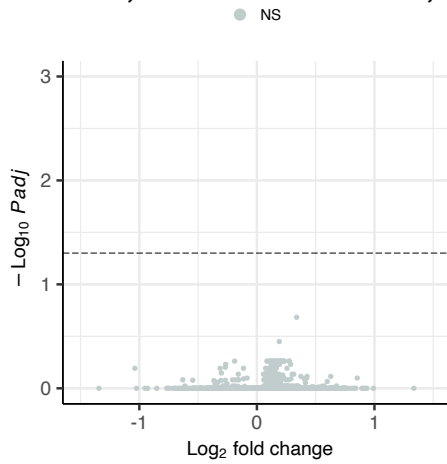

### B Proteome, APPNL-G-F; TREM2<sup>KO</sup> vs APPNL-G-F (9 mo), GSEA (GO: BP)

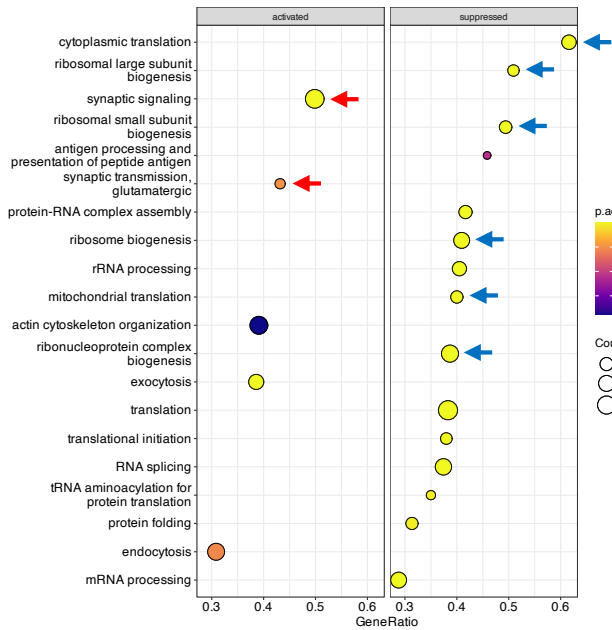

### C Transcriptome, APPNL-G-F; TREM2<sup>KO</sup> vs APPNL-G-F (9 mo), GSEA (GO: BP)

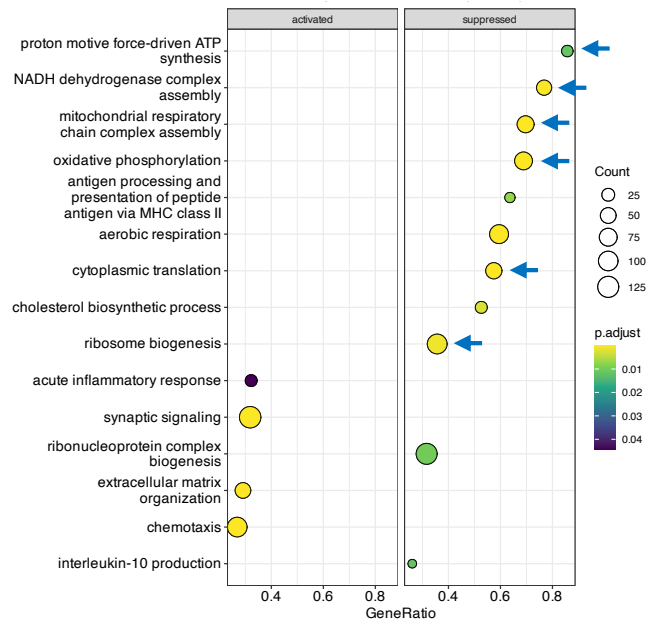

### D Directional integration of transcriptome and proteome, APPNL-G-F (9 mo vs 3 mo)

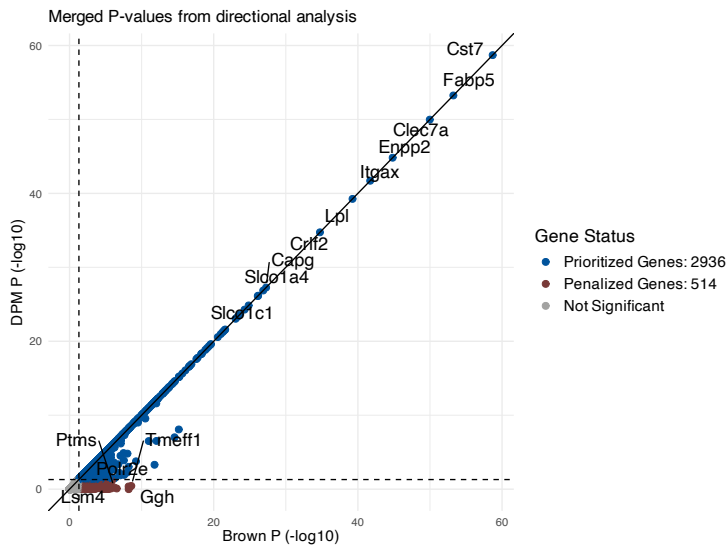

### E Unique GO term identified in APPNL-G-F Datasets (APPNL-G-F; TREM2<sup>KO</sup> vs APPNL-G-F, 9 mo)

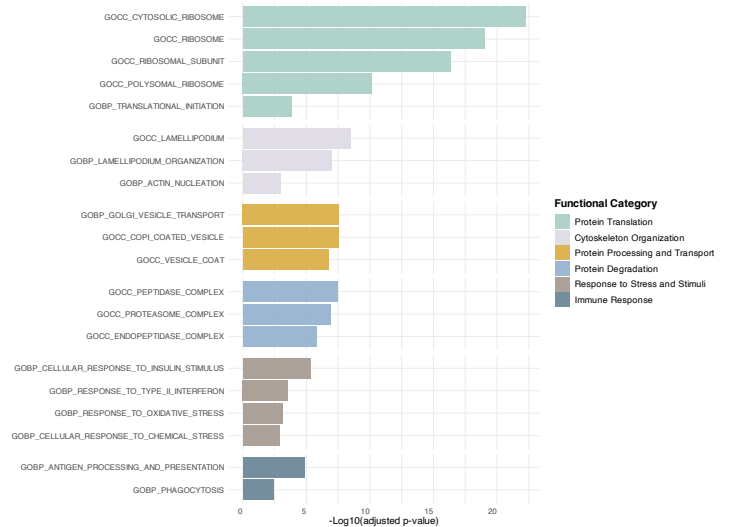

# Extended Figure 3

## A Flow Cytometry Gating Strategy for Microglia

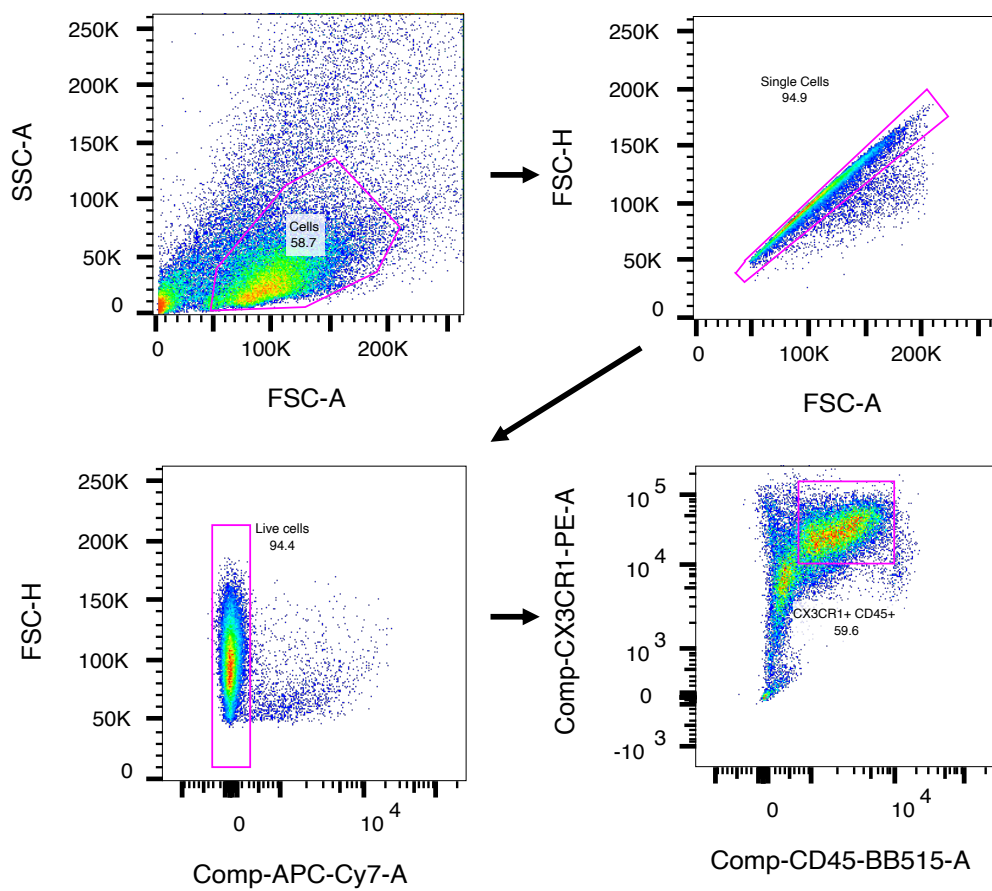

## B

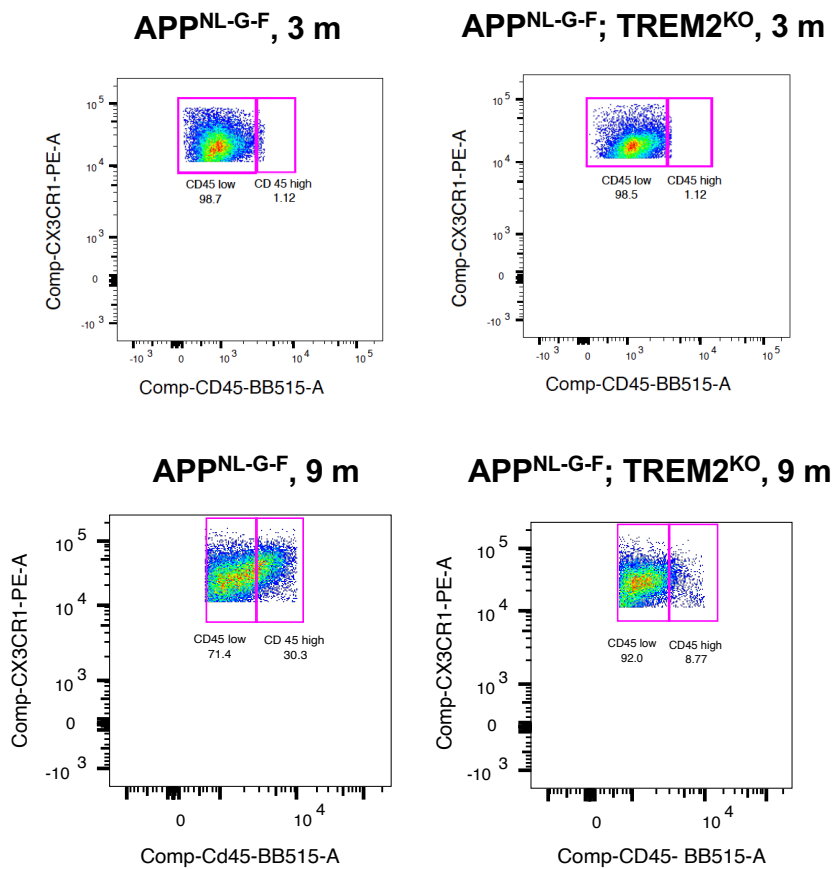

## C

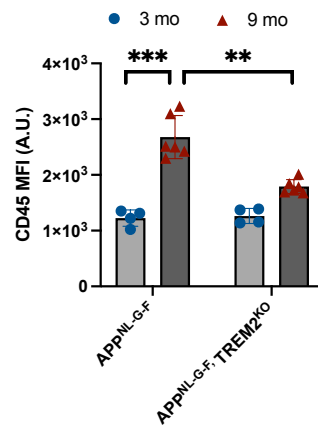

# Extended Figure 4

A

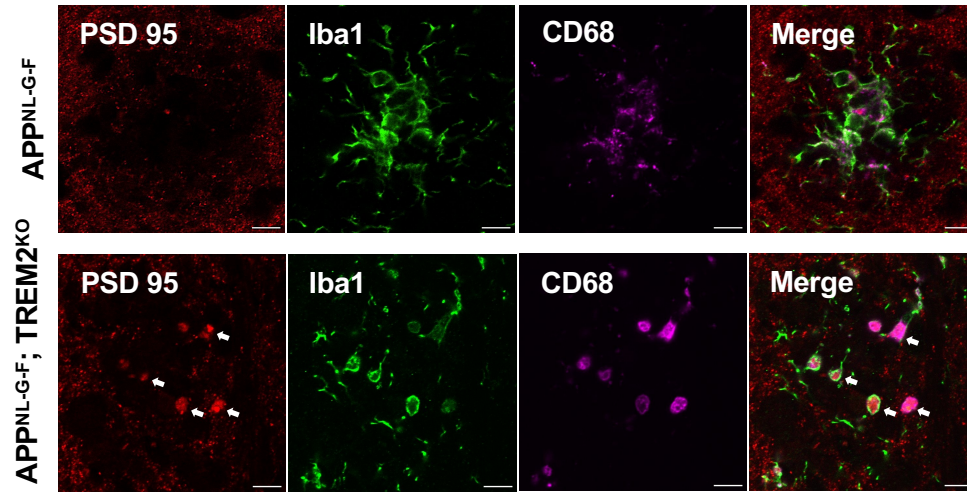

B

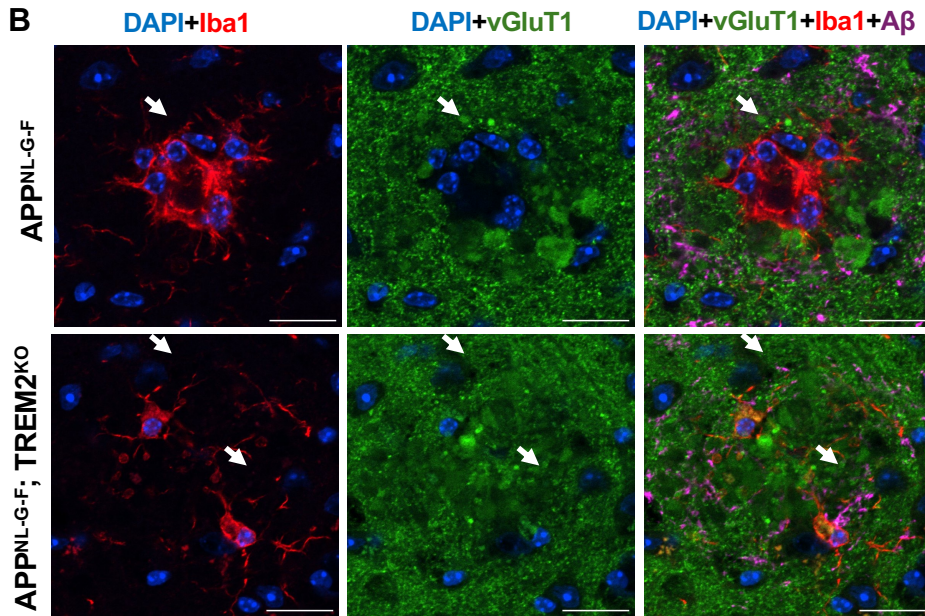

C

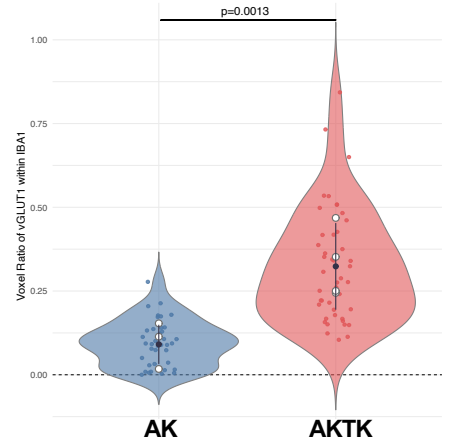

# Extended Figure 5

**A**

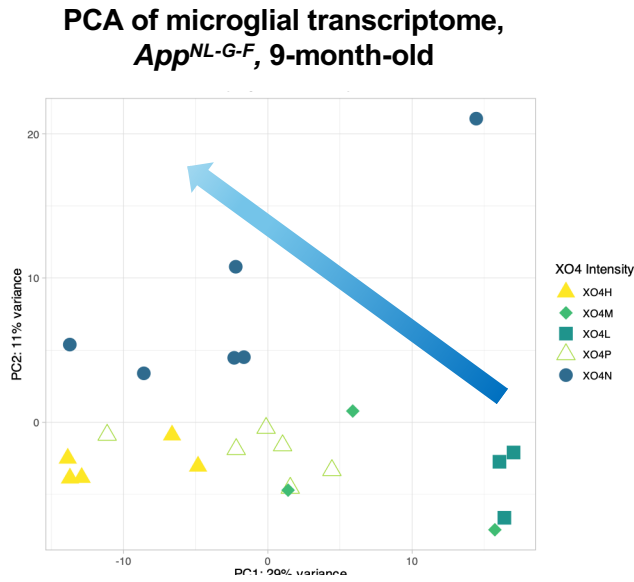

**B**

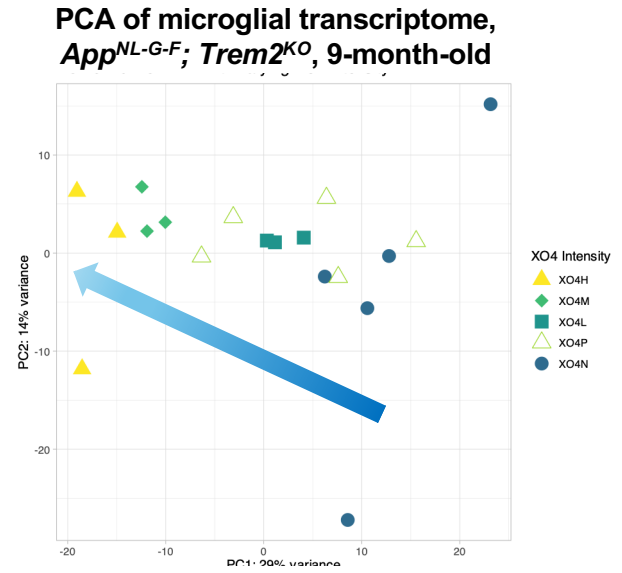

**C**

### Top ranked IPA Pathways, *App<sup>NL-G-F</sup>; Trem2<sup>KO</sup>*, 9-month-old

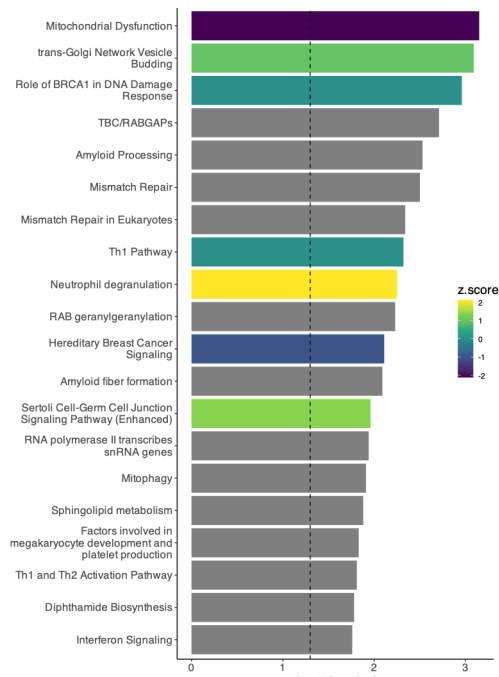

Extended Figure 6

CD45-high vs CD45-low (*App<sup>NL-G-F</sup>*)

A

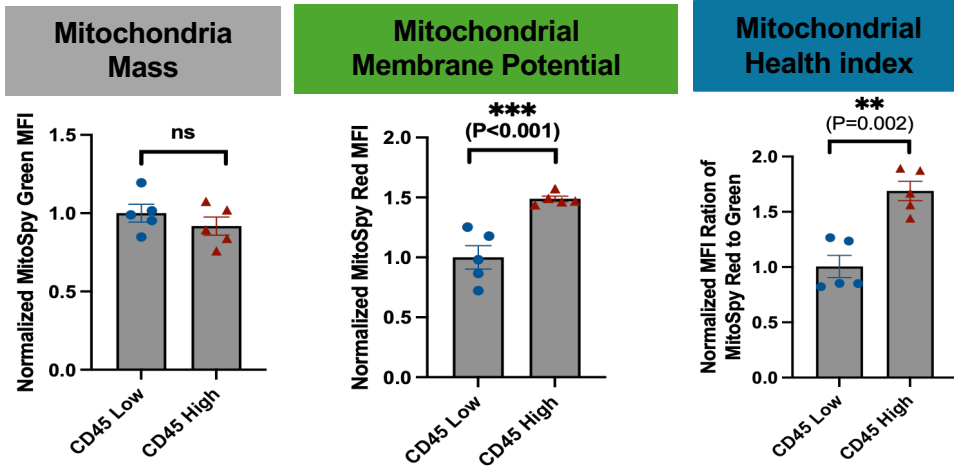

B

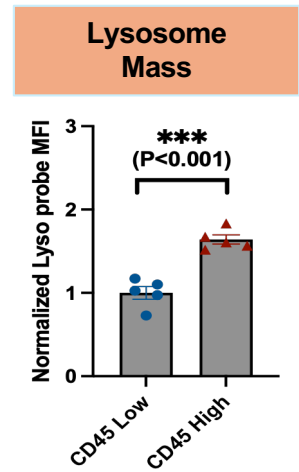

C

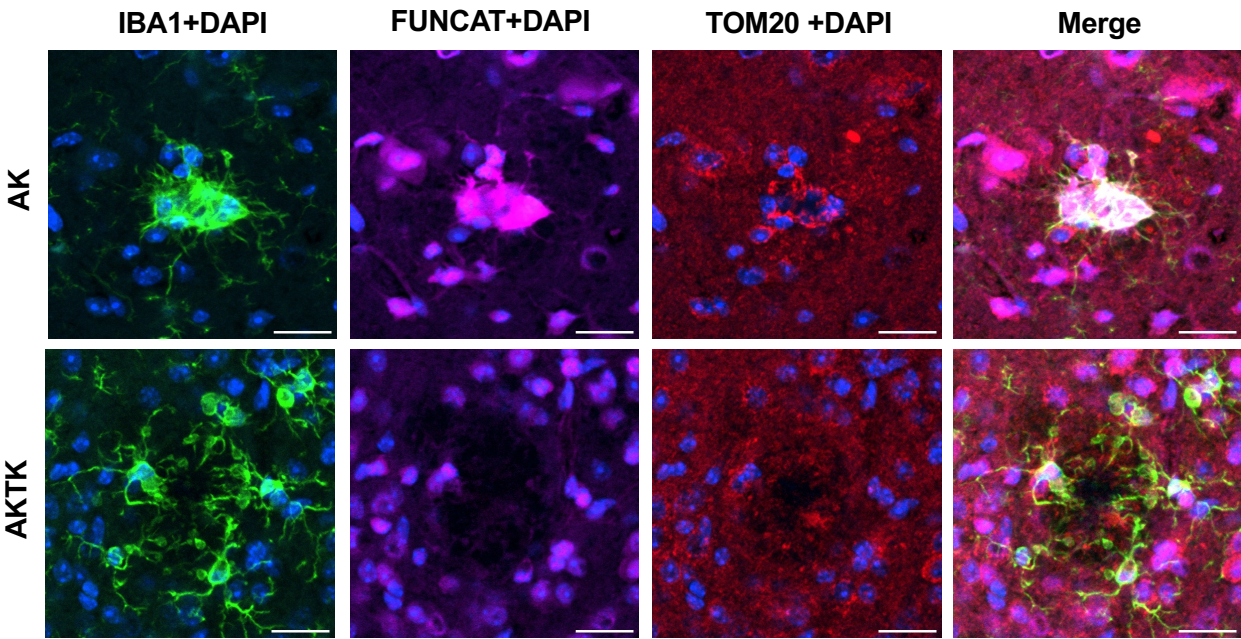

D

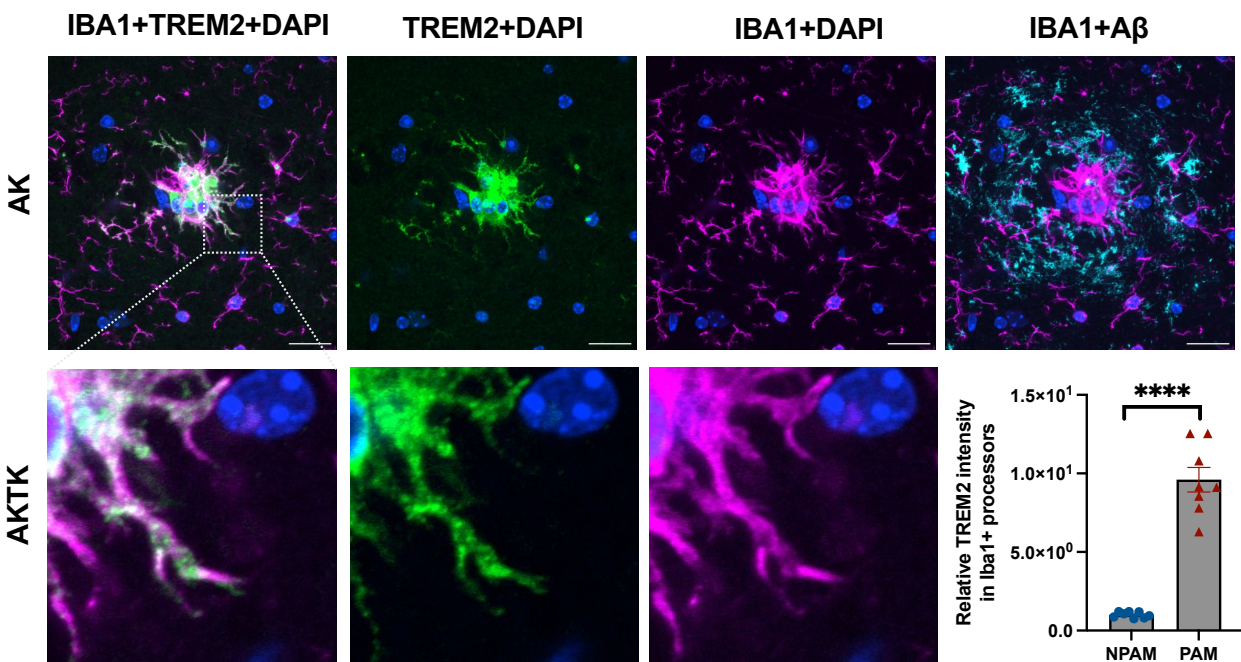

# Extended Figure 6 (Continued)

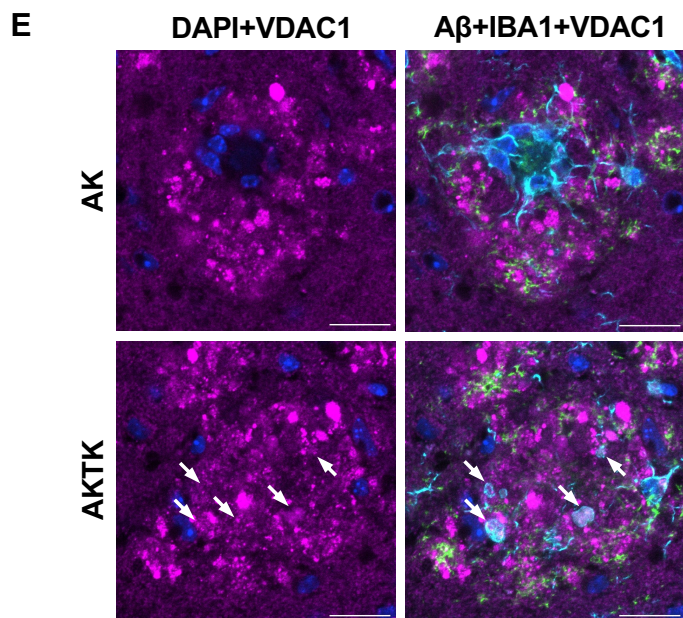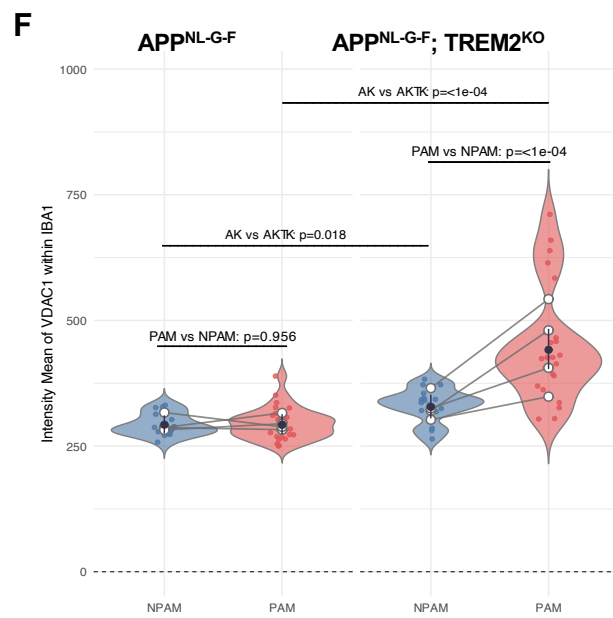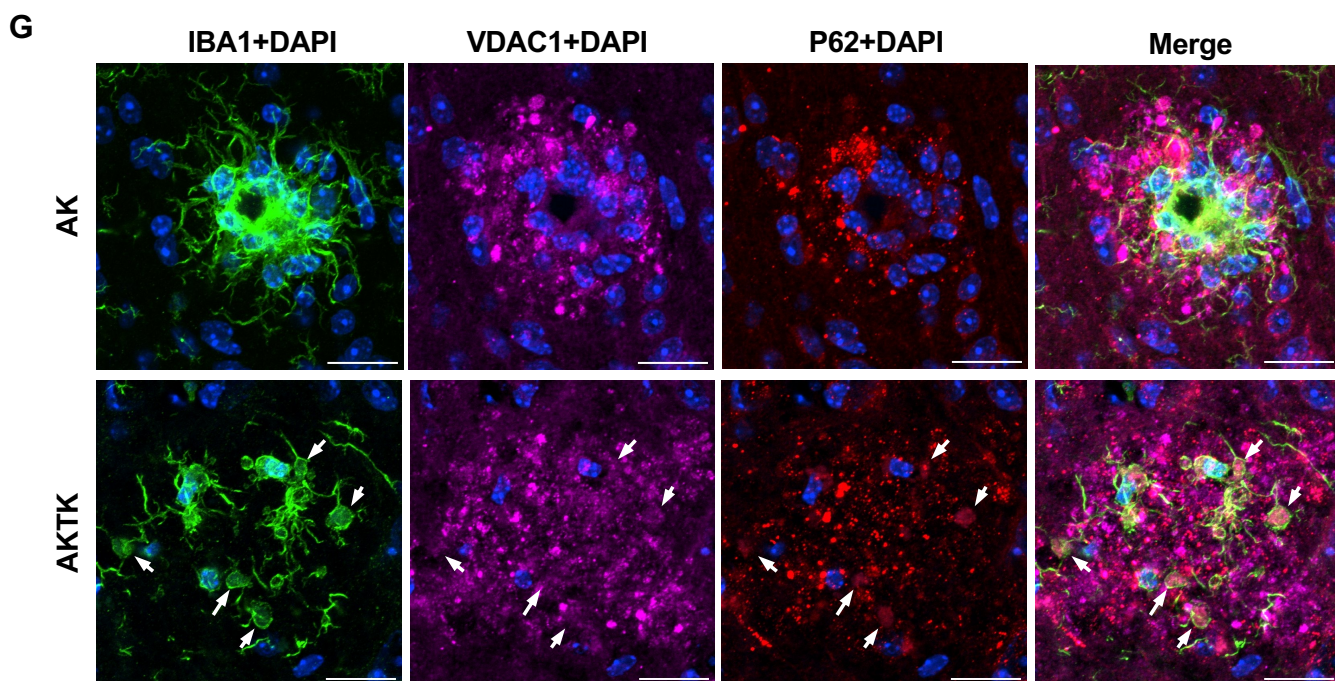

Extended Figure 7

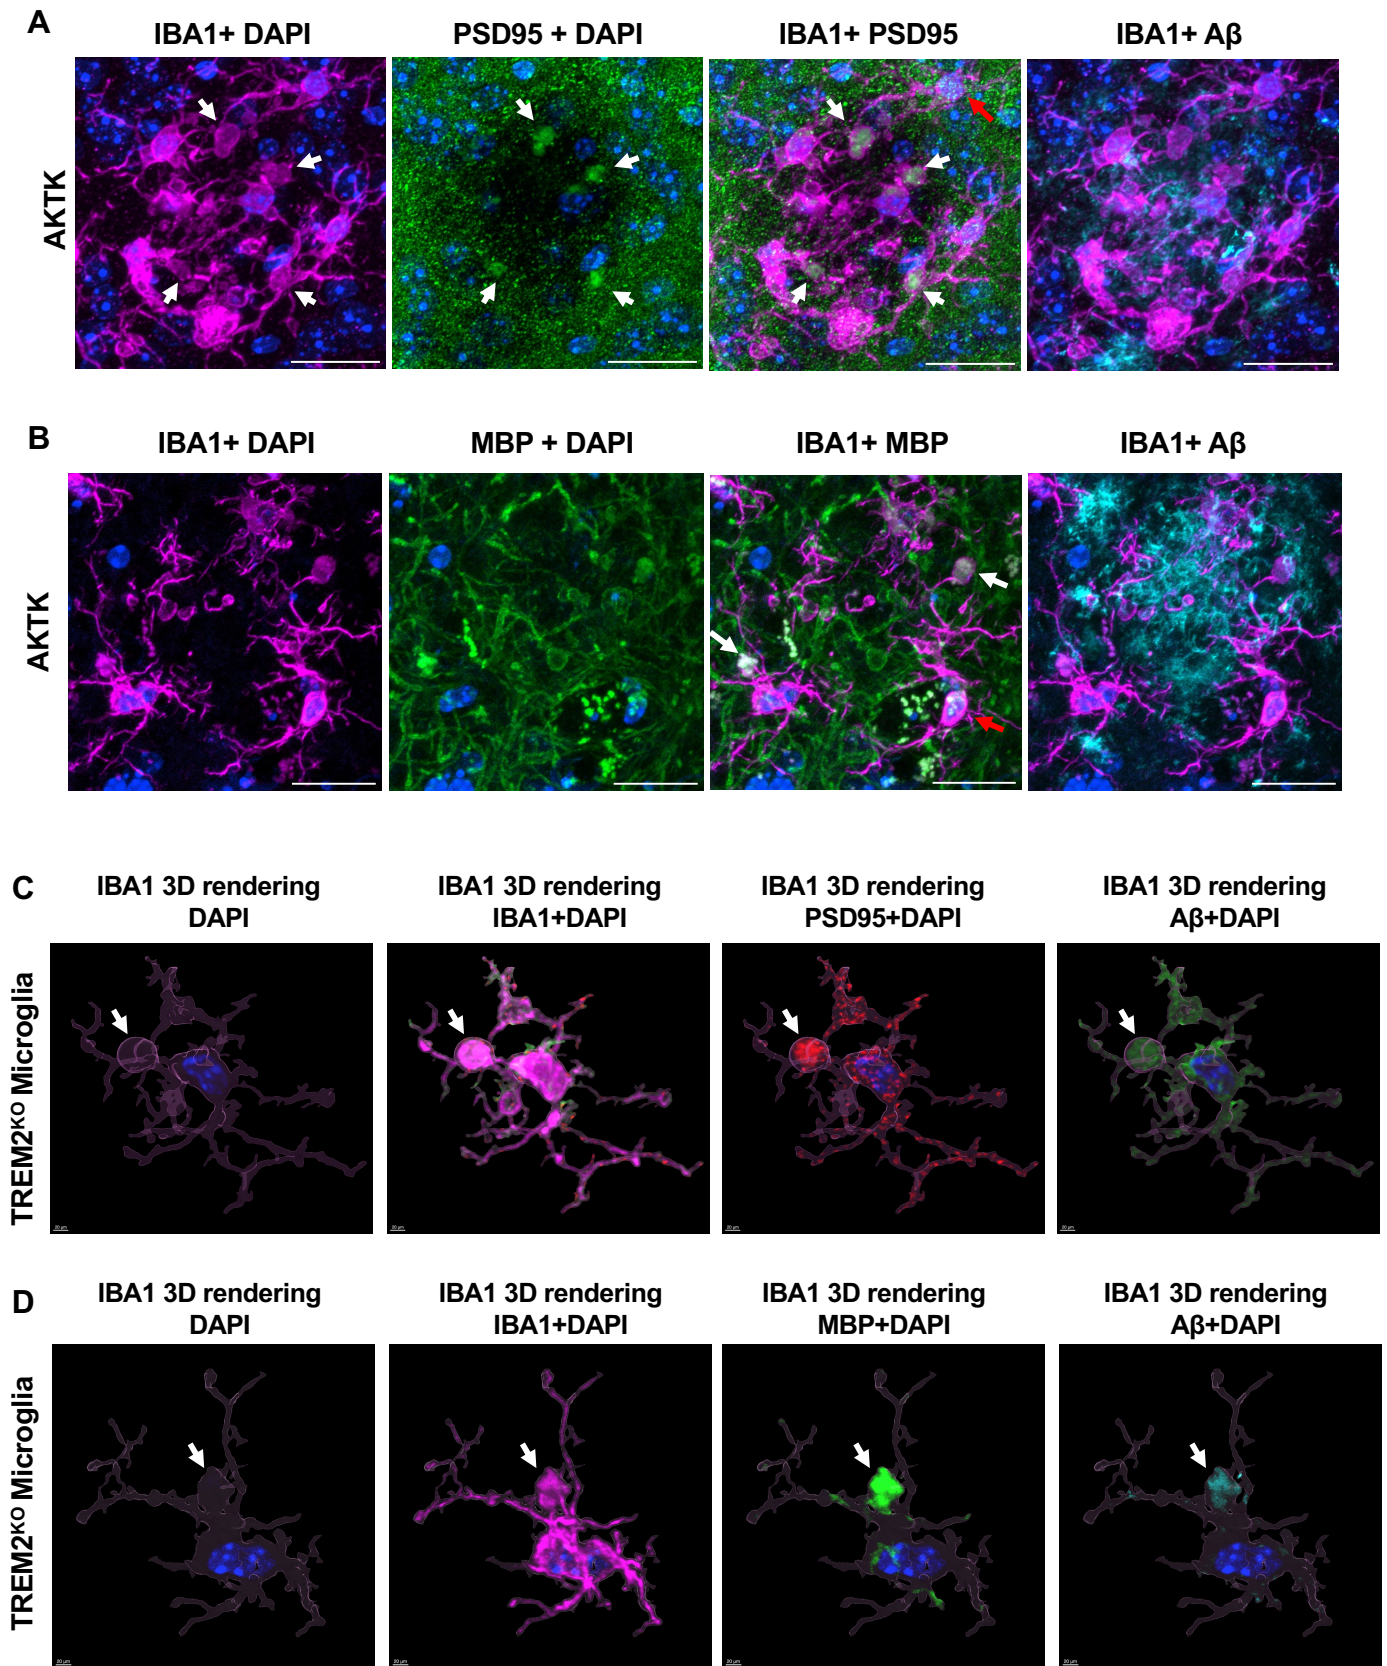

Extended Figure 7 (Continued)

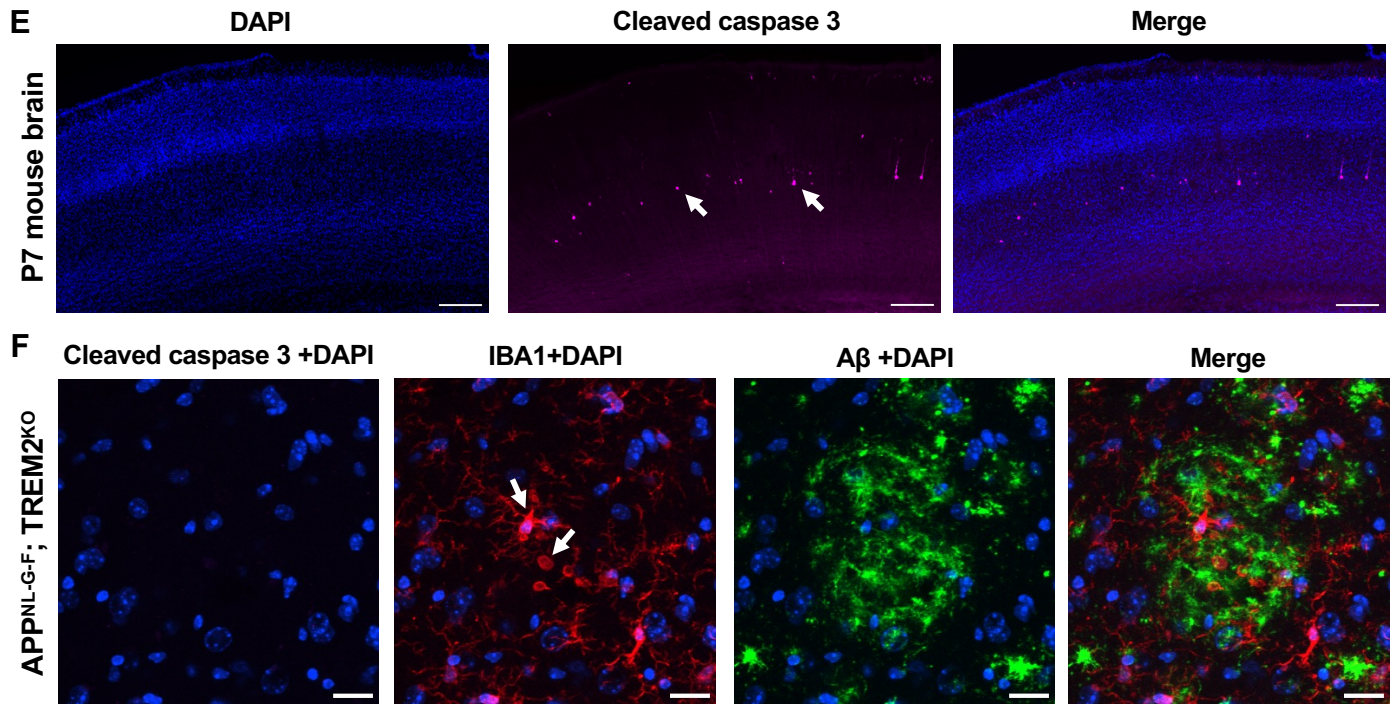

# Extended Figure 8

**A**

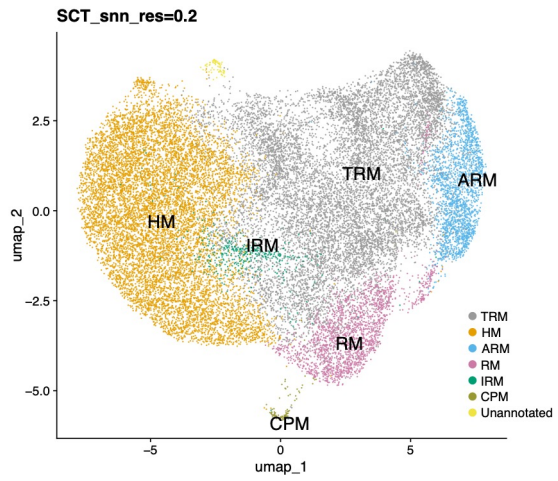

**B**

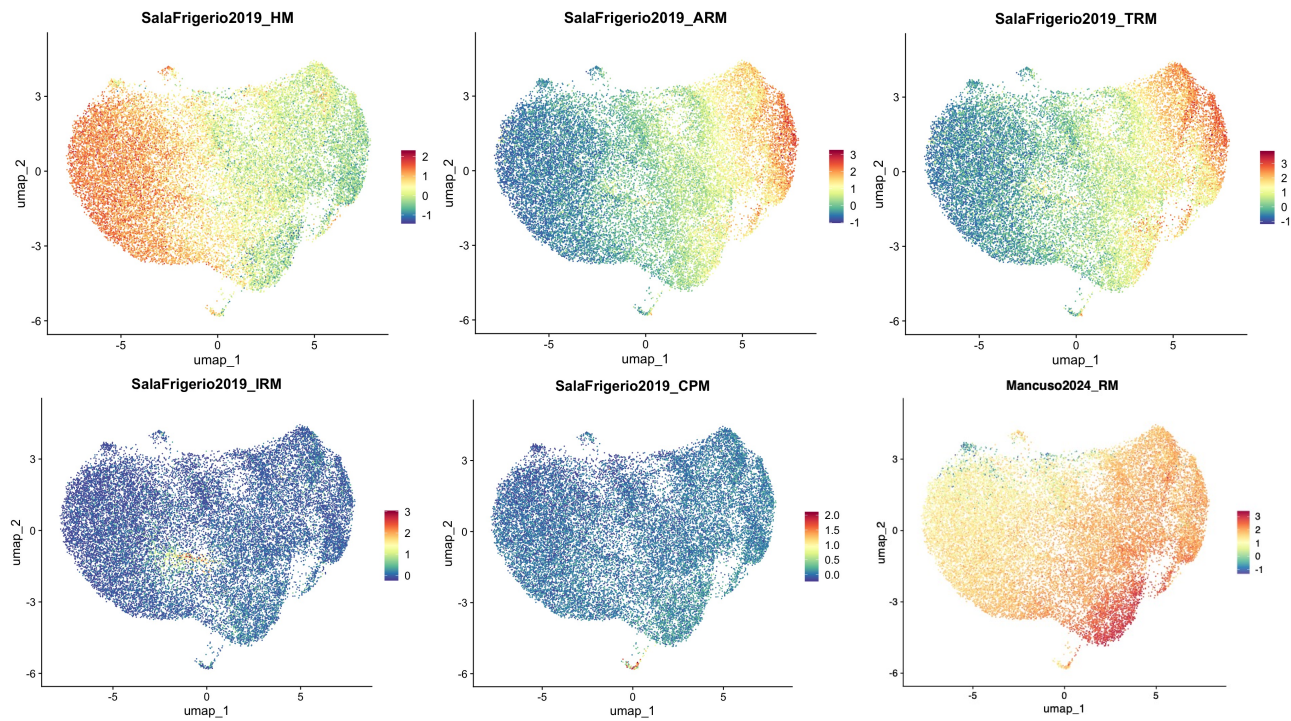

**C**

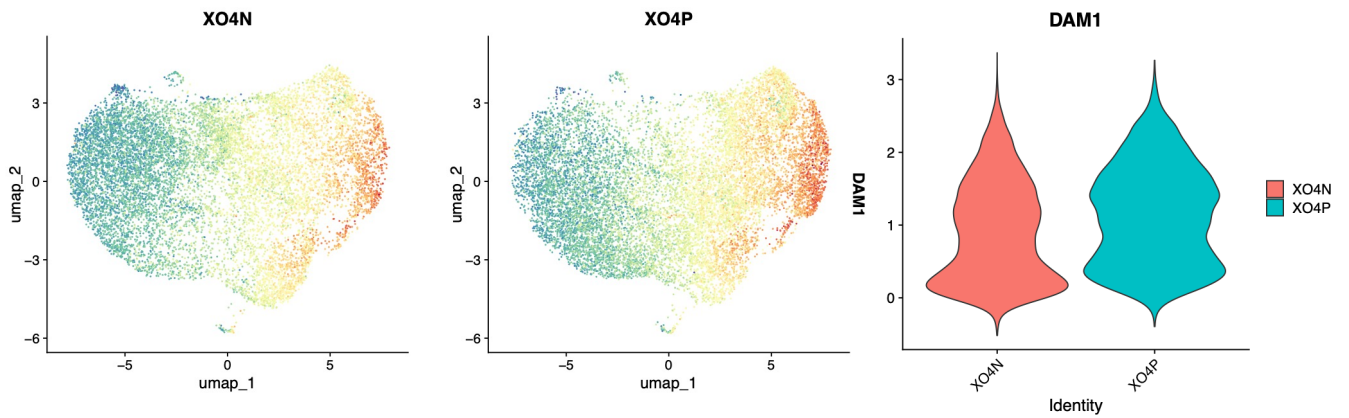

# Extended Figure 8 (Continued)

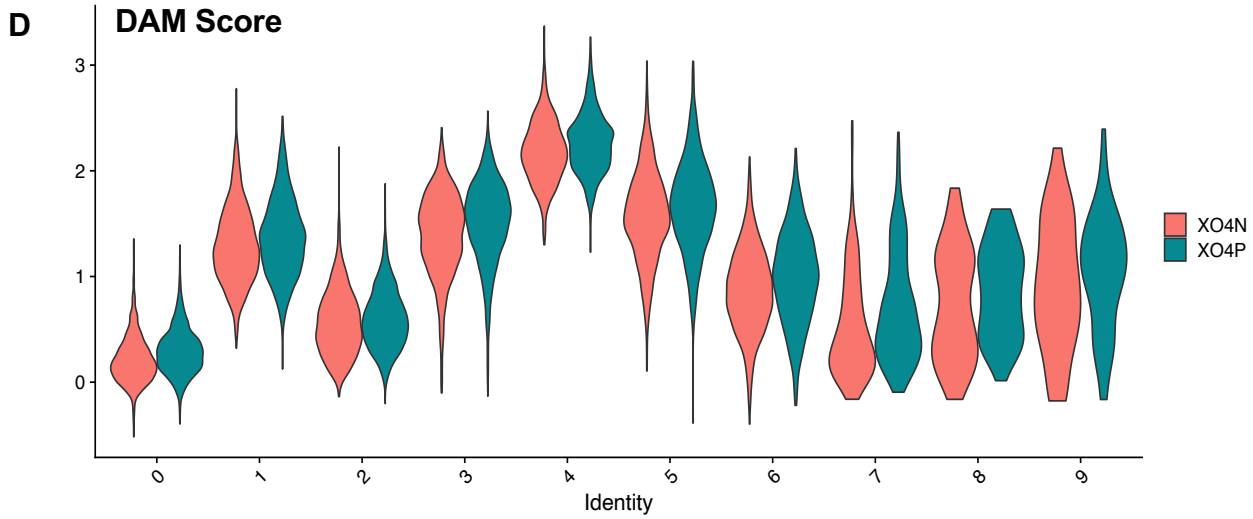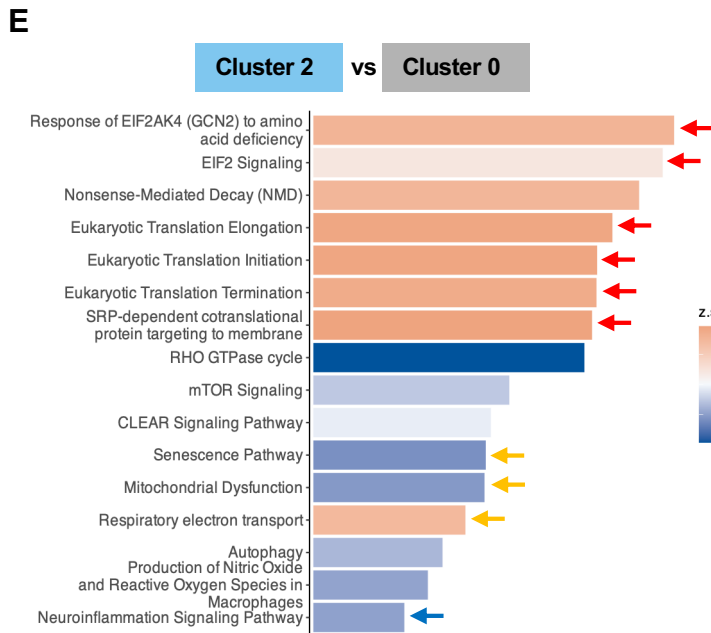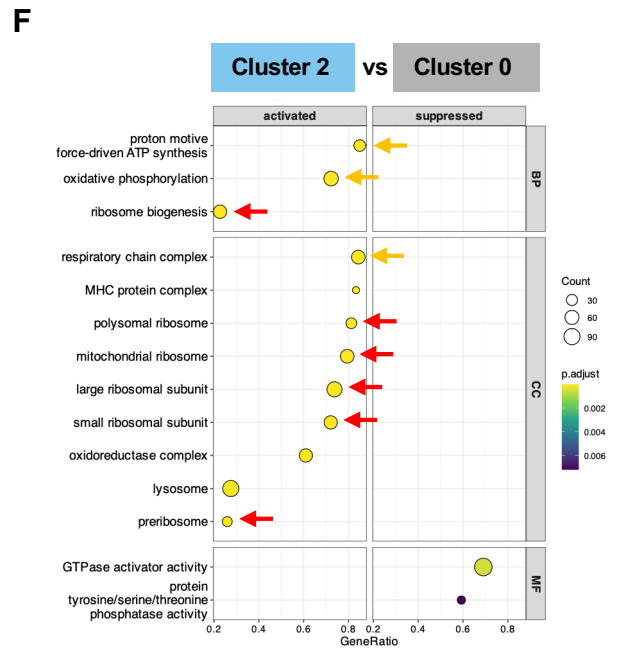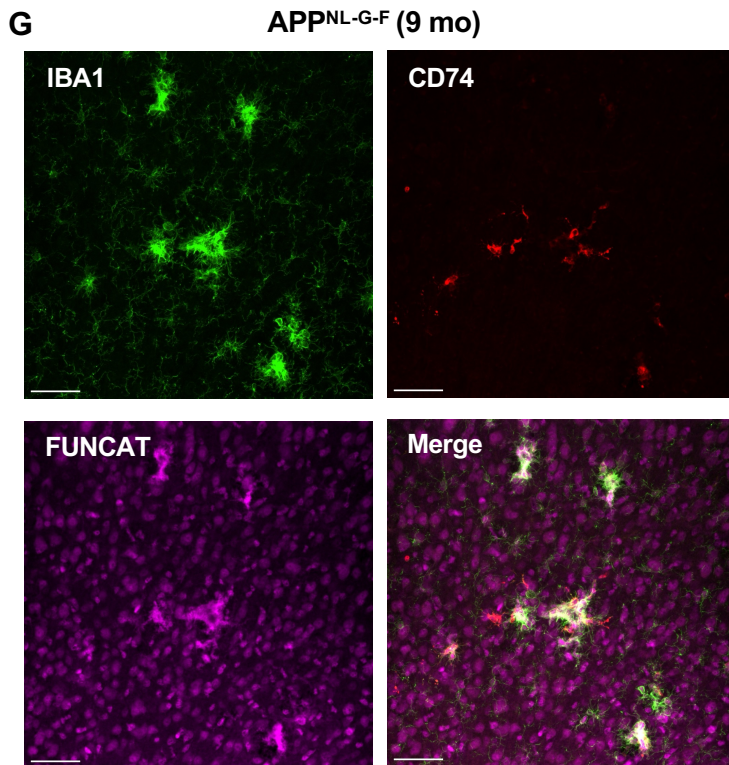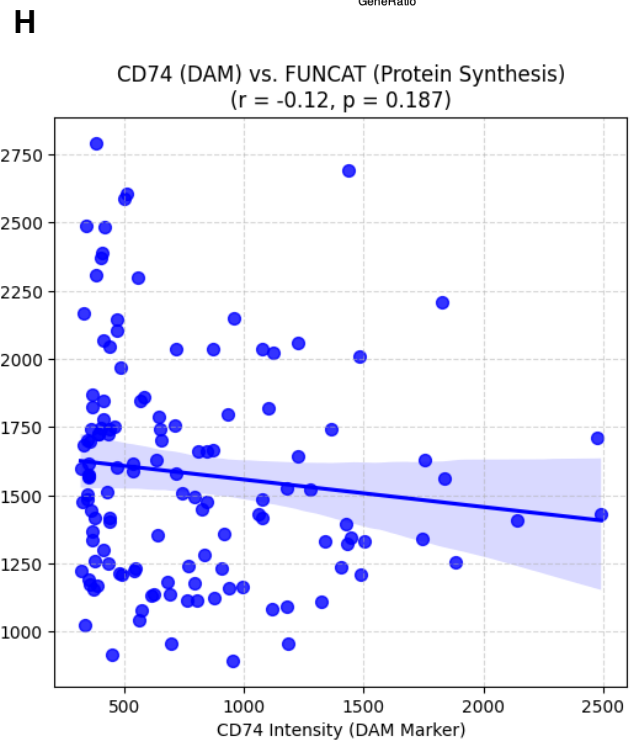

Supplement: Supplementary file 1 [file 3062a38be21afcb0bb71ba53.pdf]
