# Supplementary material
Source: Research Square preprint supplement (doi:10.21203/rs.3.rs-8896508/v1)
Supplement: Supplementary file 2 [file bd25ed057f7377fff3f3bc5b.docx]

**Extended Figure 1. (A)** Gene-concept network plots display the top 10 differentially abundant proteins associated with the Gene Ontology (GO) terms ‘small ribosomal subunit’, ‘large ribosomal subunit’, and ‘mitochondrial ribosome’. These proteins are significantly enriched in 9-month-old *AppNL-G-F*microglia compared to 3-month-old controls. Visualization was generated using the Kamada–Kawai layout algorithm. **(B)** Gene Set Enrichment Analysis (GSEA) dot plots of Biological Process (BP) terms representing the transcriptome of *AppNL-G-F*microglia. Red arrows indicate the enrichment of anabolic signatures and orange arrows indicate catabolic signatures enriched in 9-month-old *AppNL-G-F*microglia compared to 3-month-old counterparts.

**Extended Figure 2. (A)** Volcano plot showing the absence of differentially abundant proteins between *AppNL-G-F;Trem2KO* and *AppNL-G-F*microglia at 3 months of age (adjusted *P* < 0.05). **(B, C)** GSEA of BP terms representing the proteome and transcriptome of *AppNL-G-F;Trem2KO* microglia. Dot plots illustrate enriched pathways in the proteome**(B)**and transcriptome **(C)** of *AppNL-G-F;Trem2KO*microglia compared with *AppNL-G-F* counterparts at 9 months of age. Blue arrows indicate suppressed 'ribosomal' signatures. **(D)** Correlation analysis of transcriptome and proteome directional integration using ActivePathways. Scatter plot illustrating merged *P*-values calculated via directional analysis (DPM, y-axis) and non-directional analysis (Brown's method, x-axis) in *AppNL-G-F* microglia (9 months vs 3 months). Prioritized genes with directionally consistent changes across datasets are positioned on or near the diagonal (blue), whereas genes with conflicting directional changes are penalised and located further below the diagonal (brown). **(E)** Multi-omics pathway enrichment of *AppNL-G-F* microglia. Bar chart illustrating unique GO terms identified in *AppNL-G-F* microglia but absent in *AppNL-G-F;Trem2KO* microglia datasets. Multi-omics data fusion was performed using ActivePathways, with merged significance estimates generated via the directional -value merging (DPM) method. These prioritized terms are associated with proteostasis and are grouped into six functional categories (indicated by color). Significance was determined using merged *P*-values as input for enrichment analysis.

**Extended Figure 3. (A)** Representative flow cytometry gating strategy used to isolate live, singlet microglia CX3CR1+; CD45+) from dissociated brain tissue. **(B)** Representative flow cytometry plots illustrating the temporal expansion of the CD45high microglial population from 3 to 9 months of age in *AppNL-G-F*mice. Note that this expansion is severely blunted in *AppNL-G-F;Trem2KO* mice. **(C)** Quantification of CD45 Mean Fluorescence Intensity (MFI) in primary microglia isolated from *AppNL-G-F*mice and *AppNL-G-F;Trem2KO*mice at 3 and 9 months of age.

**Extended Figure 4. (A)** Representative confocal images of plaque-associated microglia in 9-month-old mice co-stained for PSD95 (postsynaptic marker), CD68 (lysosomal marker), and Iba1. White arrows highlight PSD95 puncta encapsulated within CD68+ phagolysosomes, indicating successful cargo internalization and trafficking to degradative compartments. Scale bar: 50 μm. **(B)** Representative confocal images of plaque-associated microglia in 9-month-old mice co-stained for vGluT1 (presynaptic marker), Iba1, and Aβ. White arrows highlight the pronounced intracellular accumulation of vGluT1 puncta within the soma of *Trem2KO* microglia. Scale bar: 50 μm. **(C)** Quantification of intracellular cargo accumulation (vGluT1 and others) in brain sections from 9-10 month-old *AppNL-G-F*mice and *AppNL-G-F;Trem2KO*mice. Colored points represent individual ROIs; solid black circles and error bars represent Estimated Marginal Means (EMMs) ± 95% CIs derived from a beta-binomial Generalized Linear Mixed Model (GLMM). (n = 5–6 mice per group). Pairwise comparisons were performed using the Delta method. Significance levels: *P < 0.05, **P < 0.01, ***P < 0.001, ****P < 0.0001.

**Extended Figure 5. (A, B)** Distinct transcriptional states of microglia associated with X04 intensity which represents varying degrees of Aβ load in 9-month-old *AppNL-G-F*and *AppNL-G-F;Trem2KO* microglia. **(A)** PCA of bulk RNA-seq of microglia isolated from 9-month-old *AppNL-G-F*mice (X04H, n = 5; XO4M, n = 3; XO4L, n = 3; XO4P, n = 6; XO4N, n = 6). **(B)** PCA of bulk RNAseq of microglia isolated from 9-month-old *AppNL-G-F;Trem2KO* mice (X04H, n = 3; X04M, n = 3; X04L, n = 3; X04P, n = 5; X04N, n = 5). The arrow (blue to light blue gradient) denotes the spectrum of X04 intensity, ranging from low (right) to high (left). **(C)** IPA Canonical Pathway Analysis comparing X04low versus XO4- microglia from 9-month *AppNL-G-F;Trem2KO* mice.Bar chart depicts the top 20 significantly enriched canonical pathways in XO4low microglia (*Fisher’s exact test p-value* < 0.05). Note that anabolic adaptation was completely abolished in TREM2-deficient microglia Pathways are ranked by their enrichment significance, represented as −log10(*P*-value).

**Extended Figure 6. (A)** Flow cytometry analysis of mitochondrial fitness in CD45low (non-plaque) versus CD45high (plaque-associated) microglial subpopulations isolated from 9-month-old *AppNL-G-F* mice. Quantification shows Mitochondrial Mass (MitoTracker Green), Membrane Potential (MitoTracker Red CMXRos), and the Mitochondrial Health Index (ratio of Membrane Potential to Mass). Note that CD45high microglia exhibit increase in membrane potential, indicative of expanded bioenergetic capacity to meet metabolic demands. **(B)** Flow cytometry analysis of lysosomal mass (LysoTracker Deep Red) in the same populations. Note that CD45high microglia exhibit significantly higher lysosomal mass, confirming the induction of degradative capacity alongside bioenergetics. **(C)** Representative confocal images (MIP, 4 μm z-stack) of plaque-associated microglia in 9-10 month-old *AppNL-G-F*mice and *AppNL-G-F;Trem2KO* mice, co-stained for TOM20 (mitochondria), Iba1, and FUNCAT (nascent protein synthesis). Scale bar: 20 μm. **(D)** Representative confocal images (MIP, 4 μm z-stack) co-stained for TREM2, Iba1, and Aβ in both genotypes. White boxes highlight the specific induction of TREM2 protein within the **distal processes** of *AppNL-G-F*microglia, spatially coinciding with the sites of local mitochondrial biogenesis shown in Fig. 6C. Scale bar: 20 μm. **(E)** Representative confocal images (MIP, 5 μm) of plaque-associated microglia co-stained for VADC1, Iba1, and Aβ. White arrows indicate large (>2 μm), detached exopher-like structures filled with mitochondrial content emerging from Trem2KO microglia. Scale bar: 20 μm. **(F)** Quantification of mitochondrial mass accumulation relative to plaque proximity. Violin plots display the distribution of VDAC1 instensity within Iba1+ ROIs, classified as Non-Plaque-Associated (NPAM) or Plaque-Associated (PAM). Colored points represent individual ROIs; solid circles and error bars represent Estimated Marginal Means (EMMs) ± 95% CIs derived from a beta-binomial Generalized Linear Mixed Model (GLMM). Lines connect paired regions within biological replicates (n = 5-6 mice). Pairwise comparisons were performed using the Delta method. ***P < 0.001, ****P < 0.0001. **(G)** Representative confocal images (MIP, 5 μm) of plaque-associated microglia co-stained for VADC1, P62 (autophagy receptor), and Iba1. White arrows indicate large (>2 μm), detached exopher-like structures filled with mitochondrial content (VDAC1+) and displayed high levels of p62 in Trem2KO microglia. Scale bar: 20 μm.

**Extended Figure 7. Microglial exophers contain synaptic and myelin cargo but lack apoptotic markers. (A)** Representative confocal images (MIP, 5 μm) of plaque-associated microglia co-stained for PSD95 (postsynaptic marker), Iba1, and Aβ. White arrows indicate large (>2 μm), detached exopher-like structures filled with PSD95 puncta emerging from Trem2KO microglia. Red arrow indicates the cell used for the 3D surface rendering in Figure 7A. Scale bar: 20 μm. **(B)** Representative confocal images (MIP, 5 μm) co-stained for Myelin Basic Protein (MBP), Iba1, and Aβ. White arrows indicate MBP-filled exophers in Trem2KO microglia. Red arrow indicates the cell used for the 3D surface rendering in Figure 7D. Scale bar: 20 μm. **(C-D)** Additional 3D surface renderings (Imaris) of plaque-associated microglia in *AppNL-G-F;Trem2KO* mice, confirming the budding morphology of exophers containing PSD95 (red, C) or MBP (green, D). The microglial membrane is rendered in magenta (Iba1). **(E)** Validation of the Cleaved Caspase-3 (CC3) antibody. Representative low-magnification image of the cortex (40 μm section) from a postnatal day 7 (P7) mouse pup. Note the robust CC3+ nuclear staining in layer 2–3 neurons, confirming the antibody's specificity for apoptotic cells. **(F)** Representative confocal images (MIP, 20 μm) of plaque-associated microglia co-stained for CC3, Iba1, and Aβ. The white arrow points to exopher-like vesicles and the adjacent microglial soma in *App*NL-G-F;*Trem2*KO mice brains. Note that both the vesicle and the donor cell are consistently CC3-negative, distinguishing this extrusion event from apoptosis.

**Extended Figure 8.** **(A)** Uniform Manifold Approximation and Projection (UMAP) of scRNA-seq data (resolution 0.2) identifies six distinct microglial clusters: Homeostatic Microglia (HM), Activated Response Microglia (ARM), Transition Response Microglia (TRM), Interferon Response Microglia (IRM), Cycling/Proliferating Microglia (CPM) (Sala Frigerio et al., 2019), and Ribosomal Microglia (Mancuso et al., 2024), along with a small unannotated cluster. **(B)** Validation of cluster identity using established module scores. Feature plots show the projection of gene signatures from Sala Frigerio et al. (2019), confirming consistency between the current clustering and previously defined states. Color gradients represent the calculated module score per cell (Blue: Low; Red: High). **(C)** Distribution of the canonical Disease-Associated Microglia (DAM) signature. UMAP projections (left) and violin plots (right) illustrate the expression of the DAM signature (Chen & Colonna, 2021) across non-phagocytic X04- and phagocytic X04 conditions. The y-axis represents the module score; violin width indicates cell density. **(D)** Violin plots displaying DAM module scores for each subcluster (resolution 0.3) within X04- and X04+ conditions. Note that DAM scores are comparable between phagocytic and non-phagocytic subclusters. **(E-F)** Functional profiling of the phagocytic-enriched Cluster 2 versus the non-phagocytic Cluster 0. **(E)** IPA showing top-ranked canonical pathways enriched in Cluster 2. Red arrows highlight the upregulation of Ribosome Biogenesis and Protein Synthesis; yellow arrows denote the activation of Mitochondrial Oxidative Phosphorylation. **(F)** Gene Set Enrichment Analysis (GSEA) dot plot of Biological Process (BP) terms specifically upregulated in Cluster 2. Color gradient represents adjusted P-values. **(G)** Spatial uncoupling of DAM and Anabolic markers. Representative confocal images (MIP, 20 μm) of plaque-associated microglia in 9–10 month-old *App*NL-G-F mice brains co-stained for CD74 (DAM marker), Iba1, and FUNCAT (nascent protein synthesis). Scale bar: 50 μm. **(H)** Quantification of the correlation between FUNCAT intensity and CD74 intensity within individual Iba1+ microglia. Note that CD74 expression shows no significant correlation with anabolic activity (Pearson's $R = -0.12, P = 0.187$), confirming that the transcriptional DAM state does not guarantee functional metabolic engagement.
